# Supplementary material for: Development of experimental GBS vaccine for mucosal immunization
Source: PubMed Central journal article supplement (PMC5935385; doi:10.1371/journal.pone.0196564), 2018-05-04
Supplement: pone.0196564.s004.pdf [file pone.0196564.s004.pdf]

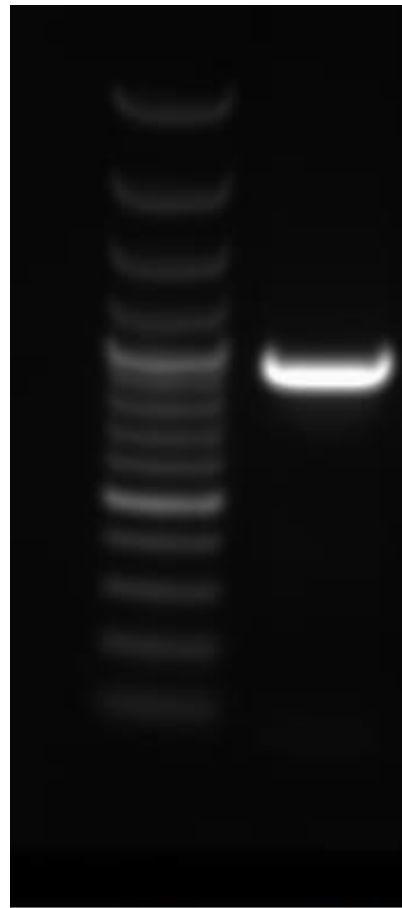

1

2
