# Supplementary material for: Development of experimental GBS vaccine for mucosal immunization
Source: PubMed Central journal article supplement (PMC5935385; doi:10.1371/journal.pone.0196564), 2018-05-04
Supplement: pone.0196564.s005.pdf [file pone.0196564.s005.pdf]

- **TGAGTGAACCACAGCCAGAA**ATTAATTCAAAAATGAGATCGATGAGAGCAGCTGG D2-1
- TATTGAGTTGAATGATACATTTCTATCTATTTACAGTTTAAATGGACAGTATCAG
- CAACGTGTGTCTTGGTATAATGACAATAATGAATCTGTCTGGTGAACGTAATATTG
- ATATGAGAGAATTTGTTGGGTATGAAAAATGGGTAGCTTACCTTATTTTGTCCAC
- AACAGATACAGCATGTGCAGAATACAAAGCTCCTGCGTTATCAACAAACAATTTA
- ACTTCAAAGTAGTGGGAGGACGTGCAGAAAAGGCTTATAGCTCGAATGATCATT
- TCACCGATGTTGTAGGAGCTGATACTTATCACAGAAGTGGTGTAAACGTATACGCT
- TCAAGGCGCTTCCCCAACATTCATGATTGGCGCAAATACGAATAGTATGATGTTT
- AGCTTTGATACTGCATTGCTATGGACACCACAACCATCGAAGCCTACAAAAGAAG
- TGTTTAAACAAAGCTAATACTGAAGAGGCAGCACACAATATTGACAAAAAAGTGAT
- TCCACAAGGATCAGATGTTTACTATCATATTCATCAAAGTTTGATGCATTAACA
- GTCAACACAATGAACAAATACAAATCATTTAAAATCACTGATACCTTTGACAGCA
- bac
- AAAATTTTGATATGGTATCGGATGGGAAAACTATGATGGCGCATTTGTTTGATGA
- AACAAATGATTCTGATGCATTATTAGAATTAGAAAATCAATTTAACGAACTAAT
- AGACTGTTACACATCAAACAACATGAAGAAGTTGAGAAAGATAAGAAAGCTAAGC
- AACAGAAAACCTCTGAAACAGTCAGATACGAAAGTAGATCTAAGCAATATTGACAA
- AGAGCTTAATCATCAAAAAGTCAAGTTGAAAAATG**GCAGAGCAAAGGGAATC**
- **AC**
